# Carboplatin-induced hematotoxicity among patients with non-small cell lung cancer: Analysis on clinical adverse events and drug-gene interactions

Yi-ju Cheng<sup>1,2,\*</sup>, Ran Wu<sup>3,\*</sup>, Ming-liang Cheng<sup>4</sup>, Juan Du<sup>1,2</sup>, Xi-wei Hu<sup>1</sup>, Lei Yu<sup>5</sup>, Xue-ke Zhao<sup>4</sup>, Yu-mei Yao<sup>4</sup>, Qi-zhong Long<sup>1,2</sup>, Li-li Zhu<sup>4</sup>, Juan-juan Zhu<sup>4</sup>, Ni-wen Huang<sup>1</sup>, Hua-juan Liu<sup>4</sup>, Ya-xin Hu<sup>4</sup> and Fang Wan<sup>1</sup>

<sup>1</sup> Department of Respiratory Medicine, The Affiliated Hospital of Guizhou Medical University, Guiyang, Guizhou, China

<sup>2</sup> Department of Respiratory Medicine, The Affiliated Baiyun Hospital of Guizhou Medical University, Guiyang, Guizhou, China

<sup>3</sup> Department of Dermatology, The First Affiliated Hospital of Guiyang college of Traditional Chinese Medicine, Baoshanbei Guiyang, Guizhou, China

<sup>4</sup> Department of Infectious Diseases, The Affiliated Hospital of Guizhou Medical University, Guiyang, Guizhou, China

<sup>5</sup> Prenatal Diagnostic Center, The Affiliated Hospital of Guizhou Medical University, Guiyang, Guizhou, China

\* These authors have contributed equally to this work

**Correspondence to:** Ming-liang Cheng, **email:** gmcmingliang\_cheng@163.com

Lei Yu, **email:** yu\_science\_00@yahoo.com

**Keywords:** carboplatin; anemia; neutropenia; thrombocytopenia; FDA adverse event reporting system

**Received:** June 14, 2016

**Accepted:** October 21, 2016

**Published:** October 27, 2016

Copyright: Cheng et al. This is an open-access article distributed under the terms of the Creative Commons Attribution License (CC-BY), which permits unrestricted use, distribution, and reproduction in any medium, provided the original author and source are credited.

## ABSTRACT

**In order to clarify the risk of hematotoxicity of carboplatin, we inspected 19901 case reports of non-small cell lung cancer patients that were submitted to the FDA Adverse Event Reporting System (FAERS) between January 2004 and December 2015. These comprised 3907 cases which were treated with carboplatin and 15994 cases which were treated with other therapies in the absence of carboplatin. By comparison, carboplatin cases were significantly more likely to report anemia (OR = 2.27, 95% CI 1.85-2.78,  $P = 5.04 \times 10^{-15}$ ), neutropenia (OR = 2.27, 95% CI 1.76-2.92,  $P = 2.39 \times 10^{-10}$ ), and thrombocytopenia (OR = 2.38, 95% CI 1.84-3.08,  $P = 5.60 \times 10^{-11}$ ). We further explored published evidences and found 205 human genes interacting with carboplatin. Functional analysis corroborated that these genes were significantly enriched in the biochemical pathway of hematopoietic cell lineage (adjusted  $P = 6.02 \times 10^{-11}$ ). This indicated that carboplatin could profoundly affect the development of blood cells. Given the early awareness of the hematologic risks, great caution should be exercised in prescribing carboplatin to non-small cell lung cancer patients. And functional enrichment analysis on carboplatin-related genes warranted subsequent research with regard to the underlying toxicological mechanisms.**

## INTRODUCTION

As a platinum coordination compound, carboplatin is broadly used as a chemotherapeutic agent to treat various types of cancer, such as non-small cell lung cancer [1]. Carboplatin interferes with DNA repair, so as to suppress and eventually kill cancer cells [2]. However,

the cell growth of normal tissues may also be affected by carboplatin [3]. As a result, serious adverse effects occur in the course of carboplatin-based chemotherapy. For example, the FDA-approved drug label [4] and a series of clinical studies [5, 6] have warned of the association between carboplatin and hematotoxicity, including anemia, neutropenia and thrombocytopenia (the deficiency of erythrocytes, neutrophils and platelets, respectively).

However, it should be noticed that hematotoxicity is not exclusive to carboplatin. As common hematologic complications of chemotherapy, anemia, neutropenia and thrombocytopenia have been widely observed in cancer patients treated with various drugs [7-9]. Although non-comparative studies have reported on the safety risks of carboplatin, there is still an urgent need for comparative case-control study to directly compare carboplatin with other anticancer therapies. If the incidence of hematologic disorders is relatively lower among carboplatin cases, there will be good reasons to reassess the safety profile of carboplatin. Otherwise, if carboplatin is significantly more likely to induce hematotoxicity, this drug must be used even more carefully. Such information will provide important references for clinicians to improve drug selection and drug dosing for the treatment of non-small cell lung cancer.

Such comparative study requires adverse event data of large samples, which is one of the major advantages of FDA post-market safety monitoring [10]. FDA Adverse Event Reporting System (FAERS) is a post-market surveillance system built up by US FDA to monitor the safety risks of approved drug products. Drug adverse events are spontaneously reported by healthcare professionals and patients to FAERS. Every report is described with a series of indexes of clinical information, including the disease(s) the patient had, the drug(s) used by the patient and the adverse reaction(s) that were observed. According to these indexes, a set of reports with certain characteristics can be extracted for analysis. Apart from drug safety surveillance of FDA, FAERS also supported a great deal of academic research on drug safety and development in recent years [11-13]. Given the increasingly extensive application of FAERS data, FDA launched the openFDA initiative (<https://open.fda.gov/>) in June 2014, which enabled researchers to efficiently download and preprocess computer-readable information [14]. In that way, the reporting rate of a certain adverse effect can be compared between different drugs.

The present study aimed to determine whether there were differences in hematologic risks between the cases treated with carboplatin and those not exposed to carboplatin. We inspected adverse event reports of non-small cell lung cancer patients that were submitted to the FAERS between January 2004 and December 2015. The results showed that hematologic adverse events were significantly more reported among carboplatin cases. In addition, we explored published evidences and found a set of human genes interacting with carboplatin. Functional enrichment analysis on these genes explained the potential toxicological mechanisms of carboplatin-induced hematotoxicity.

## RESULTS

### Pooled Analysis of hematotoxicity adverse events

The current meta-analysis on hematotoxicity involved a total of 19901 adverse events of non-small cell lung cancer patients, which were comprised of 3907 cases exposed to carboplatin and 5994 controls treated with other therapies in the absence of carboplatin. For each year between 2004 and 2015, a reporting odds ratio (ROR) [15] regarding hematologic adverse events was calculated by comparing the carboplatin cases with the controls (see Materials and Methods). And the meta-analysis pooling individual RORs together led to an overall estimate.

We performed  $\chi^2$ -based Q test and calculated  $I^2$  statistics to examine the heterogeneity underlying the FAERS reports of different years [16]. There was significant heterogeneity for anemia, neutropenia and thrombocytopenia (Table 1), which justified the random-effects model for meta-analysis (see Materials and Methods). Overall, significantly higher risks of hematotoxicity were observed in carboplatin cases (Figure 1). Carboplatin was more often reported for anemia (pooled ROR = 2.27, 95% CI 1.85-2.78,  $P = 5.04 \times 10^{-15}$ ), neutropenia (pooled ROR = 2.27, 95% CI 1.76-2.92,  $P = 2.39 \times 10^{-10}$ ), and thrombocytopenia (pooled ROR = 2.38, 95% CI 1.84-3.08,  $P = 5.60 \times 10^{-11}$ ). Funnel plot was generated and Egger's linear regression test [17] was performed to evaluate the reporting bias of adverse events (see Materials and Methods). The shape of funnel plot did not reveal any evidence of detectable asymmetry (Figure 2) and suggested the absence of reporting bias. Leave-one-out sensitivity analyses (i.e., a single year in the meta-analysis was deleted each time to observe the influence on the value of pooled ROR) showed that the lower bounds of 95% CI of ROR were constantly higher than 1.00 (data not shown). These tests corroborated that the positive results were reliable and robust.

### Analysis on genes interacting with carboplatin

It is a well-known fact that drug effects on human body work through the interaction between the drug molecule and various genes/proteins [18]. Therefore, adequate exploration of drug-gene relation can greatly facilitate understanding the toxicological mechanisms of carboplatin-induced hematotoxicity. To address this need, we searched the Drug2Gene knowledge base [19] and efficiently identified a set of 205 human genes interacting with carboplatin (Supplementary Data S1). The relation between each of these genes and carboplatin was supported by published and/or experimentally tested evidences derived from 23 source databases (see Materials

(A)

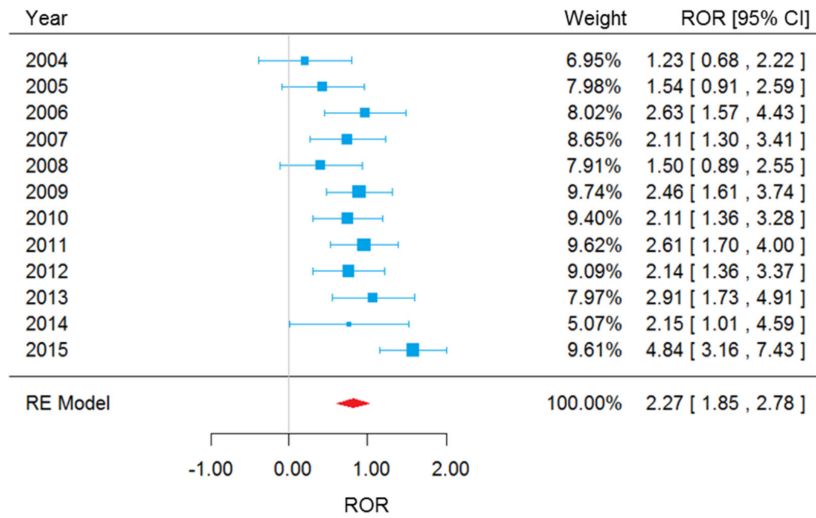

(B)

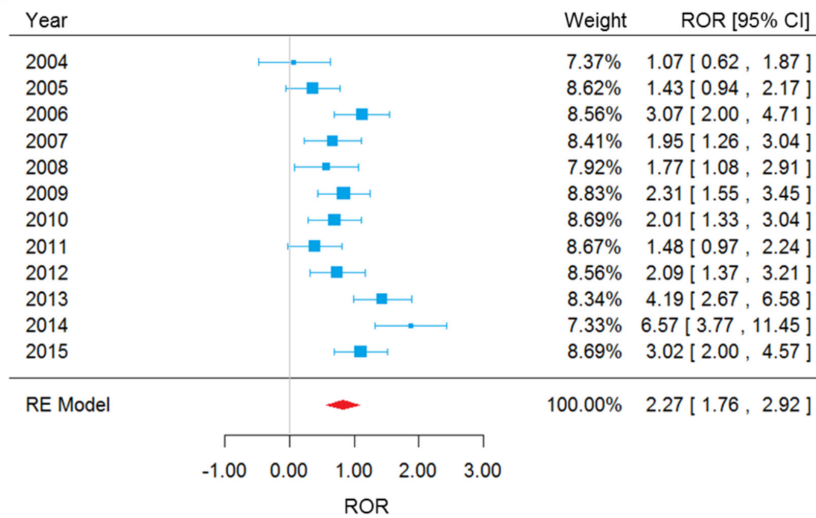

(C)

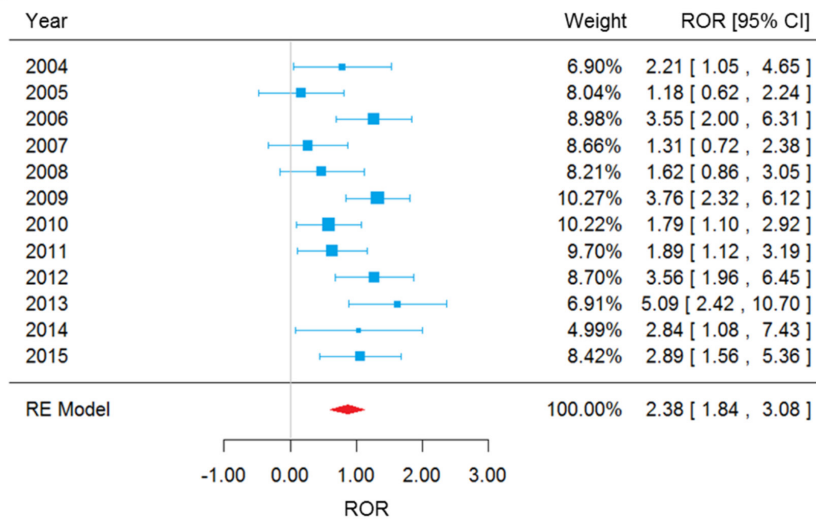

Figure 1: Forest plot of random-effects (RE) meta-analysis on anemia A., neutropenia B. and thrombocytopenia C. adverse events.

**Table 1: Result of Q test for heterogeneity between different years.**

| Adverse Effect   | P-value of Q test     | I <sup>2</sup> statistics (%) | Method of Meta-analysis |
|------------------|-----------------------|-------------------------------|-------------------------|
| Anemia           | 0.02                  | 51.32                         | Random-effects Model    |
| Neutropenia      | 1.26×10 <sup>-5</sup> | 75.20                         | Random-effects Model    |
| Thrombocytopenia | 0.015                 | 53.15                         | Random-effects Model    |

**Table 2: A portion of KEGG pathways showing significant enrichment of carboplatin-related genes.**

| KEGG Pathway               | Number of Human Genes in the Category | Number of Carboplatin-related Genes in the Category | Enrichment Ratio | Adjusted P-value       |
|----------------------------|---------------------------------------|-----------------------------------------------------|------------------|------------------------|
| Pathways in cancer         | 326                                   | 43                                                  | 27.88            | 4.48×10 <sup>-47</sup> |
| Colorectal cancer          | 62                                    | 17                                                  | 57.97            | 3.03×10 <sup>-24</sup> |
| Small cell lung cancer     | 85                                    | 16                                                  | 39.79            | 4.45×10 <sup>-20</sup> |
| Prostate cancer            | 89                                    | 16                                                  | 38.01            | 8.42×10 <sup>-20</sup> |
| Chronic myeloid leukemia   | 73                                    | 14                                                  | 40.54            | 6.77×10 <sup>-18</sup> |
| Pancreatic cancer          | 70                                    | 13                                                  | 39.26            | 1.52×10 <sup>-16</sup> |
| Bladder cancer             | 42                                    | 9                                                   | 45.3             | 2.41×10 <sup>-12</sup> |
| Non-small cell lung cancer | 54                                    | 9                                                   | 35.23            | 1.98×10 <sup>-11</sup> |
| Hematopoietic cell lineage | 88                                    | 10                                                  | 24.02            | 6.02×10 <sup>-11</sup> |
| Glioma                     | 65                                    | 9                                                   | 29.27            | 1.00×10 <sup>-10</sup> |
| Melanoma                   | 71                                    | 9                                                   | 26.8             | 2.09×10 <sup>-10</sup> |
| Renal cell carcinoma       | 70                                    | 8                                                   | 24.16            | 4.87×10 <sup>-09</sup> |
| Acute myeloid leukemia     | 57                                    | 7                                                   | 25.96            | 2.81×10 <sup>-08</sup> |
| Thyroid cancer             | 29                                    | 3                                                   | 21.87            | 0.0005                 |

and Methods). These genes served as starting points to explain the therapeutic and adverse effects of carboplatin. To interpret the biological functions of this gene set, we further queried the WebGestalt (WEB-based GENE SeT AnaLysis Toolkit) online server [20] and performed enrichment analysis for the KEGG pathways [21] (see Materials and Methods; Table 2 and Supplementary Data S2). First, compared with the background distribution of human genome, the carboplatin-related genes were unsurprisingly enriched in a series of pathways involved

in non-small cell lung cancer and other types of cancer, suggesting that the drug-gene relation data could effectively characterize the mechanism of action of carboplatin. Besides, we considered non-cancer pathways and found strong perturbations in hematopoietic cell lineage, i.e., the development progresses of various blood cells (Supplementary Data S3). Carboplatin was found to interact with a number of genes encoding cytokine (CSF2, CSF3, EPO, IL11, IL3, IL6 and TNF), cytokine receptor (IL6R), ligand of tyrosine-kinase receptor

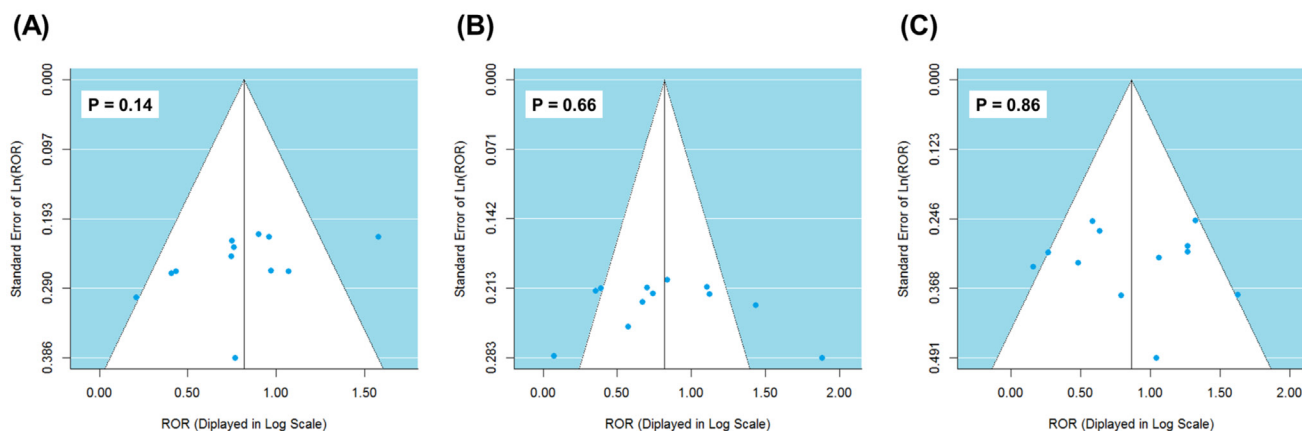

**Figure 2: Funnel plot for detecting reporting bias of anemia A., neutropenia B. and thrombocytopenia C. adverse events.**



(KITLG) and cell-surface glycoprotein (CD44), which played fundamental roles in the formation of erythrocytes, neutrophils and platelets (Figure 3). While only 88 genes in human genome belonged to the pathway of hematopoietic cell lineage, 10 out of the 205 carboplatin-related genes fell in the category. Such a significant enrichment (enrichment ratio = 24.02, adjusted  $P = 6.02 \times 10^{-11}$ ) showed that carboplatin profoundly affect the development of blood cells by interrupting certain key genes.

## DISCUSSION

Anticancer chemotherapies frequently induce bone marrow suppression and consequent deficiency of blood cells in cancer patients [22]. In some cases, the deficiency of blood cells may lead to life-threatening outcomes, such as severe infections [23] and bleeding disorders [24]. Furthermore, cancer patients affected by chemotherapy-induced hematotoxicity are usually subject to a substantial economic burden in terms of medical costs [25]. To address these problems, there is an urgent need to identify risk factors, such as the drugs more liable to hematotoxicity and the genes involved in the toxicological mechanisms. The main objective of the present study was to elucidate the comparative hematologic risks of carboplatin and to find clues to the toxicology of carboplatin.

As a derivative of anticancer drug cisplatin, carboplatin gained increasing acceptance in clinical treatment for reduced non-hematologic toxicity [1]. On the other hand, carboplatin was observed with greater risk of bone marrow suppression than cisplatin [26]. However, there has been a long lack of large-scale case-control studies that directly compare the hematologic risks between carboplatin treatment and non-carboplatin anticancer therapies. Here we retrieved large samples of non-small cell lung cancer patients from FAERS, which enabled more efficient detection of safety signals. The result demonstrated that carboplatin cases were significantly more likely to report anemia, neutropenia and thrombocytopenia than non-carboplatin controls. Early awareness of the hematologic risks of carboplatin will facilitate a rational clinical management of cancer patients [27]. As in many studies on post-market safety data, some caveats still need to be considered. For example, dose reduction is a common practice in chemotherapy for cancer treatment to control the risk of toxicity [28, 29]. However, due to the spontaneous nature of FAERS reports, detailed information about drug dosage could not be guaranteed in many records. We therefore expect subsequent research to investigate how the dosage factor [30] may influence carboplatin-induced hematotoxicity. In addition, carboplatin is used to treat not only non-small cell lung cancer but also many other types of cancer [31, 32]. Given the adverse events observed in non-small cell lung cancer patients, it should

be reasonable to further investigate carboplatin-induced hematotoxicity in other pathological conditions. Another concern is the varying quality of spontaneous reports in FAERS and the confounding effects in data analysis (e.g., age, comorbidities, and prior treatment history) [33], which requires further research based on different clinical samples.

Chemotherapy-induced hematotoxicity is mainly relieved with either transfusion of blood cells or administration of hematopoietic growth factors [34]. However, without fully understanding the underlying toxicological mechanisms, that can only fix the symptom rather than the root cause. Therefore, understanding the toxicology of carboplatin as the basis of prevention is an important research priority. Based on the drug-gene relation information from public databases, we investigated a set of 205 human genes interacting with carboplatin, some of which belonged to the KEGG pathway of hematopoietic cell lineage. For example, proteins encoded by CSF2 and CSF3 have been used experimentally and clinically to treat chemotherapy-induced myelosuppression [35, 36]. And interleukins have been proved to be associated with hematologic complications [37, 38]. These evidences supported the notion of explaining drug action by the biological functions of drug-related genes [39]. Therefore, other carboplatin-related genes involved in hematopoietic cell lineage may provide new research routes with regard to the underlying toxicological mechanisms of carboplatin, such as finding polymorphisms associated with hematotoxicity [40] and differential gene expression involved in hematopoietic lineage [41]. Experimental validation of these genes will be required to further elucidate the roles they play in the hematologic context.

In summary, hematological adverse events were significantly more reported by carboplatin cases than controls receiving other anticancer therapies, suggesting that great caution should be exercised in prescribing carboplatin to non-small cell lung cancer patients. This result had implications for clinical management of cancer patients and prophylaxis of hematotoxicity. And the genes interacting with carboplatin were found to be significantly enriched in the biochemical pathway of hematopoietic cell lineage, which warranted subsequent toxicological research.

## MATERIALS AND METHODS

### Extraction of raw adverse events

The original adverse events were queried according to the official tutorial of openFDA platform (<https://open.fda.gov/api/reference/>). Two investigators independently queried the data and the results were reviewed by a third

investigator. Inconsistency was solved by discussion with the whole research team. 19901 adverse events of non-small cell lung cancer patients submitted between 2004 and 2015 were extracted by searching in the drug indication index for “NON-SMALL CELL LUNG CANCER”. Among these adverse events, those related to carboplatin were specified with the drug generic name “CARBOPLATIN”. All reported adverse events in FAERS were coded using Medical Dictionary for Regulatory Activities (MedDRA) terminology (<http://www.meddra.org/>). So anemia, neutropenia and thrombocytopenia events were specified by searching in the adverse effect index for “ANAEMIA”, “NEUTROPENIA” and “THROMBOCYTOPENIA”, respectively.

## Statistical Analysis

We examined the association between the carboplatin and hematotoxicity. For each year between 2004 and 2015, a two-by-two contingency table was constructed, in which subjects were classified by carboplatin exposure (exposed or not exposed) and hematologic adverse effect (reported or not reported). Reporting odds ratio (ROR) and its 95% confidence interval (95% CI) were calculated to assess the strength of the association. An ROR significantly greater than 1.00 indicated a higher risk of hematotoxicity for carboplatin.

Then, the data of different years were pooled together to estimate the overall ROR. Such a meta-analysis was performed with the ‘metafor’ package (<https://cran.r-project.org/web/packages/metafor/>) of R software. The heterogeneity between different years was assessed with the  $\chi^2$ -based Q test, and a  $P$ -value  $< 0.05$  indicated significant heterogeneity. Meanwhile,  $I^2 = 100\% \times (Q - df)/Q$  was calculated as another statistics to measure the proportion of total heterogeneity contributed by between-year variation. When significant heterogeneity was observed, the pooled ROR was calculated by a random-effects model (the DerSimonian and Laird method). Otherwise, a fixed-effects model (the Mantel-Haenszel method) was selected.

Additionally, in case of bias that may be introduced in the process of reporting adverse events, we used the funnel plot to assess the validity of meta-analysis. The asymmetry of funnel plot was assessed with Egger’s linear regression test. A statistically significant asymmetry ( $P$ -value  $< 0.05$ ) was considered as reporting bias.

## Drug-gene interactions

The information of relations between carboplatin and genes/proteins was retrieved from Drug2Gene (<http://www.drug2gene.com>), a freely accessible knowledge base that combined data from 23 public databases to provide a ‘one-stop shop’ for finding all genes related to a certain

drug. By searching in the compound name index for ‘carboplatin’ and in the organism name index for ‘Homo sapiens’, a set of 205 human genes were found to interact with carboplatin’. Then, the gene set was input into the WEB-based GENE SeT AnaLysis Toolkit (WebGestalt, <http://bioinfo.vanderbilt.edu/webgestalt/>) to perform hypergeometric test and evaluate the enrichment for the KEGG pathways. As multiple pathways were tested at the same time, the  $p$ -values of enrichment were adjusted using the Benjamini-Hochberg procedure. Pathways with adjusted  $P$ -value  $< 0.01$  were selected due to statistically significant enrichment.

## ACKNOWLEDGMENTS

None.

## CONFLICTS OF INTEREST

The authors declared that they have no conflicts of interest to this work.

## REFERENCES

1. Brahmer JR and Ettinger DS. Carboplatin in the Treatment of Small Cell Lung Cancer. *The oncologist*. 1998; 3:143-154.
2. Unger FT, Klasen HA, Tchatchian G, de Wilde RL and Witte I. DNA damage induced by cis- and carboplatin as indicator for in vitro sensitivity of ovarian carcinoma cells. *BMC cancer*. 2009; 9:359.
3. Ohno S, Siddik ZH, Baba H, Stephens LC, Strebler FR, Wonderegem J, Khokhar AR and Bull JM. Effect of carboplatin combined with whole body hyperthermia on normal tissue and tumor in rats. *Cancer research*. 1991; 51:2994-3000.
4. <https://dailymed.nlm.nih.gov/dailymed/drugInfo.cfm?setid=C3AE9880-44BB-4F4E-93D8-8A5E21708A30>.
5. Cascinu S, Fedeli A, Delferro E, Fedeli S and Catalano G. Carboplatin associated anemia treated with subcutaneous erythropoietin - a pilot-study. *Oncology reports*. 1994; 1:169-172.
6. Schmitt A, Gladieff L, Laffont CM, Evrard A, Boyer JC, Lansiaux A, Bobin-Dubigeon C, Etienne-Grimaldi MC, Boisdron-Celle M, Mousseau M, Pinguet F, Floquet A, Billaud EM, et al. Factors for hematopoietic toxicity of carboplatin: refining the targeting of carboplatin systemic exposure. *Journal of clinical oncology*. 2010; 28:4568-4574.
7. Lustberg MB. Management of neutropenia in cancer patients. *Clinical advances in hematology & oncology : H&O*. 2012; 10:825-826.
8. Kuter DJ. Managing thrombocytopenia associated with cancer chemotherapy. *Oncology*. 2015; 29:282-294.

9. Rodgers GM 3rd, Becker PS, Blinder M, Cella D, Chanan-Khan A, Cleeland C, Coccia PF, Djulbegovic B, Gilreath JA, Kraut EH, Matulonis UA, Millenson MM, Reinke D, et al. Cancer- and chemotherapy-induced anemia. *Journal of the National Comprehensive Cancer Network*. 2012; 10:628-653.
10. Wu YT and Makuch RW. Sample size for post-marketing safety studies based on historical controls. *Pharmacoepidemiology and drug safety*. 2010; 19:869-875.
11. Omar MA and Wilson JP. FDA adverse event reports on statin-associated rhabdomyolysis. *The Annals of pharmacotherapy*. 2002; 36:288-295.
12. Shu M, Zai X, Zhang B, Wang R and Lin Z. Hypothyroidism Side Effect in Patients Treated with Sunitinib or Sorafenib: Clinical and Structural Analyses. *PLoS One*. 2016; 11:e0147048.
13. Wang K, Wan M, Wang RS and Weng Z. Opportunities for Web-based Drug Repositioning: Searching for Potential Antihypertensive Agents with Hypotension Adverse Events. *Journal of medical Internet research*. 2016; 18:e76.
14. Kass-Hout TA, Xu Z, Mohebbi M, Nelsen H, Baker A, Levine J, Johanson E and Bright RA. OpenFDA: an innovative platform providing access to a wealth of FDA's publicly available data. *Journal of the American Medical Informatics Association*. 2015.
15. Rothman KJ, Lanes S and Sacks ST. The reporting odds ratio and its advantages over the proportional reporting ratio. *Pharmacoepidemiol Drug Saf*. 2004; 13:519-523.
16. Higgins JP and Thompson SG. Quantifying heterogeneity in a meta-analysis. *Statistics in medicine*. 2002; 21:1539-1558.
17. Egger M, Davey Smith G, Schneider M and Minder C. Bias in meta-analysis detected by a simple, graphical test. *Bmj*. 1997; 315:629-634.
18. Zhao S and Iyengar R. Systems pharmacology: network analysis to identify multiscale mechanisms of drug action. *Annual review of pharmacology and toxicology*. 2012; 52:505-521.
19. Roider HG, Pavlova N, Kirov I, Slavov S, Slavov T, Uzunov Z and Weiss B. Drug2Gene: an exhaustive resource to explore effectively the drug-target relation network. *BMC bioinformatics*. 2014; 15:68.
20. Wang J, Duncan D, Shi Z and Zhang B. WEB-based GENE SeT AnaLysis Toolkit (WebGestalt): update 2013. *Nucleic acids research*. 2013; 41:W77-83.
21. Kanehisa M, Sato Y, Kawashima M, Furumichi M and Tanabe M. KEGG as a reference resource for gene and protein annotation. *Nucleic acids research*. 2016; 44:D457-462.
22. Gale RP. Antineoplastic chemotherapy myelosuppression: mechanisms and new approaches. *Experimental hematology*. 1985; 13 Suppl 16:3-7.
23. Bodey GP. Infection in cancer patients. A continuing association. *The American journal of medicine*. 1986; 81:11-26.
24. Elting LS, Martin CG, Kurtin DJ, Cantor SB, Rubenstein EB, Rodriguez S, Kanesan K, Vadhan-Raj S and Benjamin RS. The Bleeding Risk Index: a clinical prediction rule to guide the prophylactic use of platelet transfusions in patients with lymphoma or solid tumors. *Cancer*. 2002; 94:3252-3262.
25. Lyman GH, Berndt ER, Kallich JD, Erder MH, Crown WH, Long SR, Lee H, Song X and Finkelstein SN. The economic burden of anemia in cancer patients receiving chemotherapy. *Value in health*. 2005; 8:149-156.
26. Bunn PA, Jr. Clinical experiences with carboplatin (paraplatin) in lung cancer. *Seminars in oncology*. 1992; 19:1-11.
27. Carrato A, Vergnenegre A, Thomas M, McBride K, Medina J and Cruciani G. Clinical management patterns and treatment outcomes in patients with non-small cell lung cancer (NSCLC) across Europe: EPICLIN-Lung study. *Current medical research and opinion*. 2014; 30:447-461.
28. Duffull SB and Robinson BA. Clinical pharmacokinetics and dose optimisation of carboplatin. *Clinical pharmacokinetics*. 1997; 33:161-183.
29. Meyer RM, Hryniuk WM and Goodyear MD. The role of dose intensity in determining outcome in intermediate-grade non-Hodgkin's lymphoma. *Journal of clinical oncology*. 1991; 9:339-347.
30. Weng Z, Wang K, Li H and Shi Q. A comprehensive study of the association between drug hepatotoxicity and daily dose, liver metabolism, and lipophilicity using 975 oral medications. *Oncotarget*. 2015; 6:17031-17038. doi : 10.18632/oncotarget.4400.
31. Ozols RF. Paclitaxel (Taxol)/carboplatin combination chemotherapy in the treatment of advanced ovarian cancer. *Seminars in oncology*. 2000; 27:3-7.
32. Waxman J and Barton C. Carboplatin-based chemotherapy for bladder cancer. *Cancer treatment reviews*. 1993; 19 Suppl C:21-25.
33. Fontanarosa PB, Rennie D and DeAngelis CD. Postmarketing surveillance—lack of vigilance, lack of trust. *Jama*. 2004; 292:2647-2650.
34. Vadhan-Raj S. Management of chemotherapy-induced thrombocytopenia: current status of thrombopoietic agents. *Seminars in hematology*. 2009; 46:S26-32.
35. Hirbe AC, Uluckan O, Morgan EA, Eagleton MC, Prior JL, Pivnicka-Worms D, Trinkaus K, Apicelli A and Weilbaecher K. Granulocyte colony-stimulating factor enhances bone tumor growth in mice in an osteoclast-dependent manner. *Blood*. 2007; 109:3424-3431.
36. Beveridge RA, Miller JA, Kales AN, Binder RA, Robert NJ, Harvey JH, Windsor K, Gore I, Cantrell J, Thompson KA, Taylor WR, Barnes HM, Schiff SA, et al. A comparison of efficacy of sargramostim (yeast-derived RhuGM-CSF) and filgrastim (bacteria-derived RhuG-CSF) in the therapeutic setting of chemotherapy-induced myelosuppression. *Cancer investigation*. 1998; 16:366-373.



37. Urbonas V, Eidukaite A and Tamuliene I. The diagnostic value of interleukin-6 and interleukin-8 for early prediction of bacteremia and sepsis in children with febrile neutropenia and cancer. *Journal of pediatric hematology/oncology*. 2012; 34:122-127.
38. Hao J, Sun L, Huang H, Xiong G, Liu X, Qiu L, Chen G, Dong B, Li Y, Chen W, Buechler Y, Sun J, Shen C and Luo Q. Effects of recombinant human interleukin 11 on thrombocytopenia and neutropenia in irradiated rhesus monkeys. *Radiation research*. 2004; 162:157-163.
39. Azuaje FJ, Zhang L, Devaux Y and Wagner DR. Drug-target network in myocardial infarction reveals multiple side effects of unrelated drugs. *Scientific reports*. 2011; 1:52.
40. Mbatchi LC, Schmitt A, Thomas F, Cazaubon Y, Robert J, Lumbroso S, Brouillet JP, Pourquier P, Chatelut E, Boyer JC and Evrard A. Polymorphisms in SLCO1B3 and NR1I2 as genetic determinants of hematotoxicity of carboplatin and paclitaxel combination. *Pharmacogenomics*. 2015; 16:1439-1450.
41. Liu XL, Yuan JY, Zhang JW, Zhang XH and Wang RX. Differential gene expression in human hematopoietic stem cells specified toward erythroid, megakaryocytic, and granulocytic lineage. *Journal of leukocyte biology*. 2007; 82:986-1002.
